# Supplementary material for: Low resting heart rate is associated with recurrence in persistent atrial fibrillation after catheter ablation
Source: Research Square preprint supplement (doi:10.21203/rs.3.rs-8468599/v1), 2026-01-01
Supplement: Supplementary file 1 [file 013de0732ccb5afc5093e804.docx]

**Supplementary Table 1: Post-hoc comparison of the baseline characteristics between patient with RHR of 40-60 bpm and 61-70 bpm**

| Variables | 40-60 bpm | 61-70 bpm | *P* value | Adjusted *P* value |
| --- | --- | --- | --- | --- |
| Male sex, n (%) | 6 (27.3) | 230 (70.6) | <0.001 | <0.001 |
| Age (years) | 69.0 [62.0-75.5] | 63.0 [56.0-69.0] | 0.033 | 0.083 |
| Previous history, n (%) |  |  |  |  |
| Smoking | 1 (4.5) | 22 (6.7) | 1.000 | 1.000 |
| Drinking | 0 (0.0) | 22 (6.7) | 0.420 | 0.467 |
| Hypertension | 12 (54.5) | 200 (61.3) | 0.684 | 0.855 |
| Diabetes | 2 (9.1) | 57 (17.5) | 0.470 | 1.000 |
| Coronary artery disease | 4 (18.2) | 49 (15.0) | 0.927 | 1.000 |
| Heart failure | 5 (22.7) | 66 (20.2) | 0.995 | 0.995 |
| Cerebrovascular disease | 2 (9.1) | 36 (11.0) | 1.000 | 1.000 |
| CKD | 1 (4.5) | 13 (4.0) | 1.000 | 1.000 |
| Valvular AF, n (%) | 1 (4.5) | 6 (1.8) | 0.928 | 1.000 |
| Left atrium diameter (mm) | 45.0 [41.3-47.8] | 44.0 [40.0-48.0] | 0.330 | 0.650 |
| LVEF (%). | 60.0 [58.0-64.0] | 60.0 [55.0-64.0] | 0.470 | 0.692 |
| Duration of AF diagnosis (years) | 3.0 [0.5-6.8] | 2.0 [0.5-5.0] | 0.362 | 0.705 |
| AF recurrence, n (%) | 14 (63.6) | 109 (33.4) | 0.008 | 0.028 |
| AADs, n (%) | 12 (54.5) | 208 (63.8) | 0.520 | 0.743 |
| Rate control agents, n (%) | 11 (50.0) | 102 (31.3) | 0.114 | 0.252 |
| Oral anticoagulant, n (%) | 22 (100.0) | 284 (87.1) | 0.145 | 0.470 |
| Antiplatelet, n (%) | 0 (0.0) | 17 (5.2) | 0.557 | 0.947 |
| Statin, n (%) | 12 (54.5) | 110 (33.7) | 0.081 | 0.295 |
| Glucose lowering agents, n (%) | 2 (9.1) | 49 (15.0) | 0.652 | 1.000 |
| ACEI/ARB, n (%) | 6 (27.3) | 115 (35.3) | 0.595 | 0.922 |

*CKD* chronic kidney disease, *AF* atrial fibrillation, *LVEF* left ventricular ejection fraction, *AADs* antiarrhythmic drugs, *ACEI* angiotensin converting enzyme inhibitors, *ARB* angiotensin 2 receptor blockers.
